# Supplementary material for: Low Levels of Alcohol Consumption and Risk of Intestinal Metaplasia: A Cohort Study
Source: Oxford University Press journal article supplement (doi:10.1158/1055-9965.epi-20-0858), 2020-09-14
Supplement: 10559965epi200858-sup-244601_2_supp_6530224_qfqwt9.docx [file 10559965epi200858-sup-244601_2_supp_6530224_qfqwt9.docx]

**Supplementary Table S3.** Baseline characteristics according to missing information on alcohol data

| **Characteristics** | **Alcohol data available during follow-up** | **Alcohol data at only baseline** |
| --- | --- | --- |
| Number | 199,168 | 3,507 |
| Age, years | 36.1 (6.4) | 36.1 (8.1) |
| Male (%) | 56.0 | 21.9 |
| Current smoker (%) | 32.2 | 7.1 |
| Alcohol intake (%)a |  |  |
| Lifetime abstainer | 2.8 | 0.3 |
| Current abstainer | 8.3 | 22.0 |
| 0 to <10 g/day | 48.6 | 64.5 |
| 10 to <20 g/day | 18.4 | 6.5 |
| 20 to <40 g/day | 12.4 | 4.1 |
| ≥40 g/day | 9.5 | 2.5 |
| HEPA (%) | 15.0 | 14.0 |
| High education level (%)b | 86.2 | 81.2 |
| Hypertension (%)c | 11.9 | 12.1 |
| Diabetes (%) | 3.2 | 5.2 |
| Obesity (%)d | 39.7 | 39.1 |
| History of CVD (%) | 0.7 | 2.1 |
| History of H. pylori infection (%) | 6.9 | 5.5 |
| Medication for dyslipidemia (%) | 1.8 | 2.6 |
| Body mass index (kg/m2) | 23.2 (3.4) | 22.2 (3.6) |
| SBP | 108.6 (12.6) | 104.4 (11.7) |
| DBP | 69.4 (9.5) | 66.4 (8.6) |
| Glucose (mg/dl) | 93.7 (12.6) | 91.9 (14.1) |
| Total cholesterol (mg/dl) | 191.8 (33.4) | 187.2 (32.4) |
| LDL-C (mg/dl) | 118.8 (31.5) | 114.3 (30.1) |
| HDL-C (mg/dl) | 59.5 (15.4) | 63.6 (16.1) |
| AST | 19 (16-24) | 18 (15-21) |
| ALT | 18 (12-27) | 14 (11-21) |
| GGT | 19 (16-24) | 18 (15-21) |
| hsCRP | 0.4 (0.2-0.9) | 0.4 (0.2-0.8) |
| HOMA-IR | 1.2 (0.8-1.8) | 1.2 (0.8-1.7) |
| Total calorie intake (kcal/day) e | 1801 (1181-2643) | 1611 (1015-2486) |

Data are expressed as amean (standard deviation), bmedian (interquartile range), or percentage.

c≥College graduate; dDefined as systolic BP ≥ 140 mmHg, diastolic BP ≥ 90 mmHg, a history of hypertension, or current use of anti-hypertensive medications; eDefined as a fasting serum glucose ≥126 mg/dL, HbA1c ≥6.5%, a history of diabetes, or current use of anti-diabetic medications; fBody mass index ≥25 kg/m2.

gAmong 146,750 participants with plausible estimated energy intake level (within three standard deviations of the log-transformed mean energy intake).

Abbreviations: ALT, alanine aminotransferase; AST, aspartate aminotransferase; BP, blood pressure; CVD, cardiovascular disease; GGT, gamma-glutamyl transpeptidase; HDL-C, high-density lipoprotein-cholesterol; HEPA, health-enhancing physically active; hsCRP, high sensitivity C-reactive protein; HOMA-IR, homeostasis model assessment of insulin resistance; LDL-C, low-density lipoprotein cholesterol.
