# Supplementary material for: Low Levels of Alcohol Consumption and Risk of Intestinal Metaplasia: A Cohort Study
Source: Oxford University Press journal article supplement (doi:10.1158/1055-9965.epi-20-0858), 2020-09-14
Supplement: 10559965epi200858-sup-244601_2_supp_6530228_qfqwt9.docx [file 10559965epi200858-sup-244601_2_supp_6530228_qfqwt9.docx]

**Supplemental Table S7.** Hazard ratios (95% CI) for intestinal metaplasia and atrophic gastritis by lifetime drinking status according to flushing.

| Alcohol consumption category | Multivariable-adjusted HR(95% CI)a | | P for interaction |
| --- | --- | --- | --- |
| **No flushing (n=135,118)** | **Flushing (n=57,107)** |
| Intestinal metaplasia |  |  | 0.662 |
| Lifetime abstainer | 1.00 (reference) | 1.00 (reference) |  |
| 0 to <10 g/day | 0.92 (0.46-1.85) | 1.33 (0.71-2.50) |  |
| 10 to <20 g/day | 0.99 (0.49-1.99) | 1.35 (0.71-2.57) |  |
| 20 to <40 g/day | 1.10 (0.54-2.21) | 1.35 (0.70-2.59) |  |
| ≥40 g/day | 1.11 (0.55-2.23) | 1.43 (0.73-2.81) |  |
| *P* for trend | <0.001 | 0.450 |  |
| Current abstainer | 1.03 (0.50-2.10) | 1.28 (0.67-2.48) |  |
| Atrophic gastritis |  |  | 0.401 |
| Lifetime abstainer | 1.00 (reference) | 1.00 (reference) |  |
| 0 to <10 g/day | 0.99 (0.86-1.14) | 1.01 (0.90-1.12) |  |
| 10 to <20 g/day | 1.05 (0.91-1.21) | 1.04 (0.92-1.16) |  |
| 20 to <40 g/day | 1.08 (0.94-1.24) | 1.08 (0.96-1.22) |  |
| ≥40 g/day | 1.12 (0.97-1.29) | 1.07 (0.94-1.22) |  |
| *P* for trend | <0.001 | 0.010 |  |
| Current abstainer | 1.00 (0.86-1.16) | 1.05 (0.94-1.18) |  |

aEstimated from parametric proportional hazard models to estimate hazard ratios (HRs) and 95% confidence intervals (95% CIs). Multivariable model was adjusted for age, sex (men or women), center (Seoul or Suwon), year of screening exam (1-year category), total energy intake (in quintile or missing), physical activity (inactive, minimally active, health-enhancing physically active, or unknown), BMI (continuous), education level (high school graduate or less, community college or university graduate, graduate school or higher, or unknown), history of diabetes, history of hypertension, history of cardiovascular disease, and history of *H. pylori*.

Abbreviations: CI, confidence interval; HR, hazard ratio.
