# Supplementary material for: Low Levels of Alcohol Consumption and Risk of Intestinal Metaplasia: A Cohort Study
Source: Oxford University Press journal article supplement (doi:10.1158/1055-9965.epi-20-0858), 2020-09-14
Supplement: 10559965epi200858-sup-244601_2_supp_6530231_qfqwt9.docx [file 10559965epi200858-sup-244601_2_supp_6530231_qfqwt9.docx]

**Supplemental Table S1.** Baseline characteristics according to lifetime drinking status among men (*n* = 112,258).

| **Characteristics** | **Overall** | **Lifetime drinking status** | | | | | |
| --- | --- | --- | --- | --- | --- | --- | --- |
| **Lifetime abstainer** | **Current abstainer** | **0 to <10 g/day** | **10 to <20 g/day** | **20 to <40 g/day** | **≥40 g/day** |
| Number | 112,258 | 1,006 | 4,653 | 41,473 | 27,437 | 20,704 | 16,985 |
| Age (years)a | 36.4 (6.3) | 37.8 (7.4) | 37.1 (6.6) | 35.8 (6.0) | 36.2 (6.2) | 36.9 (6.5) | 37.2 (6.6) |
| Current smoker (%) | 34.8 | 14.2 | 20.2 | 25.4 | 34.5 | 45.0 | 50.9 |
| HEPA (%) | 16.7 | 14.8 | 16.4 | 15.4 | 16.3 | 17.9 | 19.2 |
| High education level (%)c | 90.7 | 89.7 | 89.6 | 93.6 | 91.9 | 88.9 | 83.9 |
| Hypertension (%)d | 11.9 | 9.7 | 9.5 | 9.2 | 10.9 | 14.5 | 17.6 |
| Diabetes (%)e | 3.2 | 3.3 | 3.3 | 2.5 | 2.8 | 3.8 | 4.7 |
| History of CVD (%) | 0.7 | 1.0 | 0.7 | 0.6 | 0.8 | 0.7 | 1.0 |
| Medication for dyslipidemia (%) | 1.8 | 2.6 | 2.0 | 1.6 | 1.7 | 2.1 | 2.3 |
| History of *H. pylori* | 5.8 | 4.7 | 6.3 | 5.3 | 5.7 | 5.9 | 6.8 |
| Histological *H. pylori* infectiong | 69.5 | 65.5 | 64.5 | 67.5 | 71.2 | 70.8 | 70.9 |
| Obesity (%)f | 39.7 | 39.2 | 37.2 | 35.0 | 39.6 | 43.3 | 48.0 |
| Body mass index (kg/m2)a | 24.5 (3.0) | 24.4 (3.3) | 24.3 (3.1) | 24.2 (3.0) | 24.6 (3.0) | 24.8 (3.0) | 25.1 (3.1) |
| Systolic BP (mmHg)a | 114.4 (11.0) | 112.6 (10.7) | 111.8 (11.1) | 112.9 (10.9) | 114.4 (10.9) | 115.7 (11.0) | 117.2 (11.2) |
| Diastolic BP (mmHg)a | 73.1 (9.0) | 71.8 (8.8) | 71.7 (8.7) | 71.7 (8.7) | 73.0 (8.9) | 74.3 (9.1) | 75.6 (9.4) |
| Glucose (mg/dL)a | 96.1 (14.0) | 95.1 (13.5) | 94.8 (15.3) | 94.7 (12.6) | 68.7 (12.8) | 97.4 (15.3) | 98.9 (16.6) |
| Total cholesterol (mg/dL)a | 198.0 (34.1) | 195.1 (34.2) | 196.5 (34.0) | 195.5 (33.8) | 197.9 (33.8) | 200.2 (34.1) | 202.0 (35.1) |
| LDL-C (mg/dL)a | 127.8 (31.4) | 128.5 (31.6) | 126.1 (30.9) | 127.5 (31.0) | 128.1 (31.2) | 128.0 (31.6) | 127.8 (32.3) |
| HDL-C (mg/dL)a | 53.7 (13.0) | 51.7 (11.8) | 51.9 (12.4) | 52.9 (12.5) | 53.5 (12.9) | 54.6 (13.6) | 55.6 (13.9) |
| Triglycerides (mg/dL)b | 109 (77-158) | 99 (70-142) | 103 (74-147) | 101 (73-144) | 108 (78-156) | 117 (82-169) | 125 (88-184) |
| AST (U/L)b | 22 (18-27) | 21 (18-26) | 21 (18-27) | 21 (18-26) | 22 (18-27) | 22 (19-28) | 23 (19-30) |
| ALT (U/L)b | 24 (17-35) | 24 (17-36) | 23 (17-34) | 23 (17-34) | 24 (17-35) | 25 (18-36) | 26 (18-38) |
| GGT (U/L)b | 29 (20-46) | 22 (16-34) | 24 (17-37) | 24 (17-36) | 28 (20-44) | 35 (23-56) | 43 (27-72) |
| hsCRP (mg/L)b | 0.5 (0.3-1.0) | 0.5 (0.3-1.1) | 0.5 (0.3-1.0 | 0.5 (0.3-1.0) | 0.5 (0.3-1.0) | 0.5 (0.3-1.0) | 0.5 (0.3-1.1) |
| HOMA-IRb | 1.30 (0.85-1.93) | 1.30 (0.87-2.00) | 1.29 (0.85-1.92) | 1.27 (0.84-1.90) | 1.29 (0.85-1.92) | 1.31 (0.86-1.95) | 1.36 (0.89-2.04) |
| Total calorie intake (kcal/day)b, h | 1625.7 (1275.8-2039.4) | 1577.7 (1202.4-2018.3) | 1619.9 (1271.7-2043.7) | 1604.2 (1260.1-2002.8) | 1617.7 (1275.3-2017.4) | 1632.0 (1286.0-2059.2) | 1693.5 (1314.9-2143.8) |
| Sodium intake (mg/d)b, h | 1799.5 (1180.0-2641.4) | 1574.9 (1040.0-2386.4) | 1723.1-1103.8-2503.0) | 1679.9 (1103.5-2478.7) | 1774.3 (1176.5-2596.6) | 1906.6 (1251.5-2751.7) | 2074.1 (1368.0-3005.7) |

Data are expressed as amean (standard deviation), bmedian (interquartile range), or percentage.

c≥College graduate; dDefined as systolic BP ≥ 140 mmHg, diastolic BP ≥ 90 mmHg, a history of hypertension, or current use of anti-hypertensive medications; eDefined as a fasting serum glucose ≥126 mg/dL, HbA1c ≥6.5% a history of diabetes, or current use of anti-diabetic medications; fBody mass index ≥25 kg/m2.

gAmong 4,615 (4.1%) men whose biopsy was histologically tested for *H.pylori* infection by Giemsa stain.

hAmong 80,792 participants with plausible estimated energy intake levels (within three standard deviations of the log-transformed mean energy intake).

Abbreviations: ALT, alanine aminotransferase; AST, aspartate aminotransferase; BP, blood pressure; CVD, cardiovascular disease; GGT, gamma-glutamyl transpeptidase; HDL-C, high-density lipoprotein-cholesterol; HEPA, health-enhancing physically active; hsCRP, high sensitivity C-reactive protein; HOMA-IR, homeostasis model assessment of insulin resistance; LDL-C, low-density lipoprotein cholesterol.

SI conversion factors: to convert glucose to millimoles per liter, multiply by 0.0555; total cholesterol, HDL-C, and LDL-C to millimoles per liter, multiply by 0.0259; triglycerides to millimoles per liter, multiply by 0.0113; AST, ALT, and GGT to microkatals per liter, multiply by 0.0167; and hsCRP to nanomoles per liter, multiply by 9.524.
