# Supplementary material for: Low Levels of Alcohol Consumption and Risk of Intestinal Metaplasia: A Cohort Study
Source: Oxford University Press journal article supplement (doi:10.1158/1055-9965.epi-20-0858), 2020-09-14
Supplement: 10559965epi200858-sup-244601_2_supp_6530232_qfqwt9.docx [file 10559965epi200858-sup-244601_2_supp_6530232_qfqwt9.docx]

**Supplemental Table S2.** Baseline characteristics according to lifetime drinking status among women (*n* = 90,417).

| **Characteristics** | **Overall** | **Lifetime drinking status** | | | | | |
| --- | --- | --- | --- | --- | --- | --- | --- |
| **Lifetime abstainer** | **Current abstainer** | **0 to <10 g/day** | **10 to <20 g/day** | **20 to <40 g/day** | **≥40 g/day** |
| Number | 90,417 | 4,589 | 12,639 | 57,617 | 9,397 | 4,207 | 1,968 |
| Age (years)a | 35.7 (6.5) | 41.2 (8.4) | 36.1 (6.7) | 35.6 (6.0) | 34.4 (6.3) | 34.0 (6.7) | 33.0 (6.6) |
| Current smoker (%) | 2.3 | 0.9 | 1.4 | 1.5 | 404 | 7.8 | 12.7 |
| HEPA (%) | 12.8 | 13.8 | 11.6 | 12.4 | 14.7 | 15.9 | 16.8 |
| High education level (%)c | 80.5 | 77.3 | 79.1 | 84.0 | 73.4 | 66.8 | 59.5 |
| Hypertension (%)d | 2.6 | 6.6 | 2.6 | 2.2 | 2.6 | 3.6 | 4.0 |
| Diabetes (%)e | 1.0 | 2.3 | 1.2 | 0.9 | 0.9 | 1.1 | 0.8 |
| History of CVD (%) | 0.4 | 0.9 | 0.5 | 0.3 | 0.4 | 0.4 | 0.5 |
| Medication for dyslipidemia (%) | 0.7 | 2.9 | 0.8 | 0.5 | 0.5 | 0.5 | 0.4 |
| History of *H. pylori* | 4.0 | 5.1 | 3.9 | 4.1 | 3.6 | 3.5 | 3.8 |
| Histological *H. pylori* infectiong | 59.8 | 56.0 | 66.0 | 56.8 | 61.9 | 78.2 | 66.7 |
| Obesity (%)f | 10.9 | 13.0 | 11.4 | 10.0 | 12.0 | 14.7 | 15.0 |
| Body mass index (kg/m2)a | 21.4 (3.0) | 21.7 (3.1) | 21.5 (3.1) | 21.3 (2.9) | 21.6 (3.1) | 21.9 (3.2) | 22.0 (3.3) |
| Systolic BP (mmHg)a | 101.1 (10.3) | 103.6 (12.2) | 99.9 (10.3) | 100.8 (10.1) | 101.9 (10.0) | 103.1 (10.6) | 104.0 (10.8) |
| Diastolic BP (mmHg)a | 64.6 (7.9) | 65.9 (8.7) | 64.0 (8.0) | 64.4 (7.7) | 65.3 (7.9) | 66.3 (8.5) | 67.3 (8.7) |
| Glucose (mg/dL)a | 90.7 (9.9) | 92.1 (11.5) | 90.1 (9.9) | 90.6 (9.5) | 91.2 (10.6) | 91.6 (10.7) | 91.9 (9.9) |
| Total cholesterol (mg/dL)a | 183.9 (30.6) | 189.5 (33.1) | 184.5 (31.1) | 183.3 (30.4) | 183.6 (30.3) | 184.5 (30.3) | 183.2 (29.8) |
| LDL-C (mg/dL)a | 107.5 (27.8) | 115.0 (30.1) | 107.7 (27.9) | 107.8 (27.5) | 105.1 (27.7) | 104.2 (27.9) | 100.6 (27.9) |
| HDL-C (mg/dL)a | 66.8 (15.0) | 64.0 (14.8) | 64.4 (14.3) | 66.5 (14.6) | 69.5 (15.7) | 70.9 (16.8) | 72.9 (17.0) |
| Triglycerides (mg/dL)b | 68 (53-91) | 73 (56-100) | 68 (53-92) | 67 (53-89) | 67 (53-89) | 70 (54-95) | 72 (55-99) |
| AST (U/L)b | 17 (15-20) | 18 (15-21) | 17 (15-20) | 17 (15-20) | 17 (15-20) | 17 (15-20) | 18 (15-21) |
| ALT (U/L)b | 13 (10-16) | 13 (11-18) | 13 (10-17) | 13 (10-16) | 12 (10-16) | 12 (10-16) | 13 (10-17) |
| GGT (U/L)b | 13 (10-17) | 13 (10-17) | 12 (10-16) | 13 (10-16) | 14 (11-18) | 15 (12-21) | 16 (13-23) |
| hsCRP (mg/L)b | 0.3 (0.2-0.6) | 0.3 (0.2-0.7) | 0.3 (0.2-0.7) | 0.3 (0.2-0.6) | 0.3 (0.2-0.6) | 0.3 (0.2-0.6) | 0.3 (0.2-0.6) |
| HOMA-IRb | 1.09 (0.73-1.58) | 1.10 (0.73-1.62) | 1.08 (0.73-1.57) | 1.09 (0.73-1.58) | 1.10 (0.73-1.58) | 1.12 (0.76-1.63) | 1.13 (1.74-1.67) |
| Total calorie intake (kcal/day)b, h | 1325.6 (968.3-1713.9) | 1398.9 (1029.6-1784.5) | 1329.7 (971.3-1722.9) | 1333.2 (980.7-1716.2) | 1279.5 (928.7-1661.5) | 1254.1 (880.1-1702.3) | 1254.4 (866.1-1726.1) |
| Sodium intake (mg/d)b, h | 1436.8 (928.8-2198.8) | 1515.4 (951.9-2345.0) | 1480.0 (901.4-2191.5) | 1416.5 (924.8-2158.1) | 1475.0 (924.8-2158.1) | 1524.0  (951.8-2330.6) | 1647.4 (1046.5-2634.9) |

Data are expressed as amean (standard deviation), bmedian (interquartile range), or percentage.

c≥College graduate; dDefined as systolic BP ≥ 140 mmHg, diastolic BP ≥ 90 mmHg, a history of hypertension, or current use of anti-hypertensive medications; eDefined as a fasting serum glucose ≥126 mg/dL, HbA1c ≥6.5% a history of diabetes, or current use of anti-diabetic medications; fBody mass index ≥25 kg/m2.

gAmong 1,588 (1.8%) women whose biopsy was histologically tested for *H. pylori* infection by Giemsa stain.

hAmong 65,958 participants with plausible estimated energy intake levels (within three standard deviations of the log-transformed mean energy intake).

Abbreviations: ALT, alanine aminotransferase; AST, aspartate aminotransferase; BP, blood pressure; CVD, cardiovascular disease; GGT, gamma-glutamyl transpeptidase; HDL-C, high-density lipoprotein-cholesterol; HEPA, health-enhancing physically active; hsCRP, high sensitivity C-reactive protein; HOMA-IR, homeostasis model assessment of insulin resistance; LDL-C, low-density lipoprotein cholesterol.

SI conversion factors: to convert glucose to millimoles per liter, multiply by 0.0555; total cholesterol, HDL-C, and LDL-C to millimoles per liter, multiply by 0.0259; triglycerides to millimoles per liter, multiply by 0.0113; AST, ALT, and GGT to microkatals per liter, multiply by 0.0167; and hsCRP to nanomoles per liter, multiply by 9.524.
